# Supplementary material
Source: PubMed Central journal article supplement (PMC6880180)
Supplement: JVI.01616-19-s0002.pdf [file JVI.01616-19-s0002.pdf]

## **Supplemental Material for Publication**

**Movie S1.** Expression of fluorescent signal by rSA11/NSP3-FL-UnaG and rSA11/NSP1-FL-UnaG over the course of infection. Images were collected at 6 min intervals from 0 to 16 h p.i. using an epifluorescence Nikon TiE inverted microscope with a 20x Plan Apo (NA 0.75) differential interference contrast (DIC) objective.
